# Supplementary material for: Rapid surfactant-free synthesis of Mg(OH)2 nanoplates and pseudomorphic dehydration to MgO
Source: Royal Society of Chemistry journal article supplement (doi:10.1039/c5ce00595g), 2015-01-01
Supplement: c5ce00595g1.pdf [file c5ce00595g1.pdf]

## Electronic Supplementary Information

### Rapid surfactant-free synthesis of $\text{Mg}(\text{OH})_2$ nanoplates and pseudomorphic dehydration to $\text{MgO}$ .

James M. Hanlon,<sup>a</sup> Laura Bravo Diaz,<sup>a,b</sup> Giulia Balducci,<sup>a</sup> Blane A. Stobbs,<sup>a</sup> Marek Bielewski,<sup>b</sup> Peter Chung<sup>c</sup> and Duncan H. Gregory.<sup>a\*</sup>

<sup>a</sup> WestChem, School of Chemistry, University of Glasgow, Glasgow, G12 8QQ, United Kingdom

<sup>b</sup> European Commission, Joint Research Centre (JRC) Institute for Energy and Transport, Westerduinweg 3, 1755 LE Petten, The Netherlands

<sup>c</sup> School of Geographical and Earth Sciences, Gregory Building, Lilybank Gardens, University of Glasgow, Glasgow, G12 8QQ, United Kingdom.

E-mail: Duncan.Gregory@glasgow.ac.uk

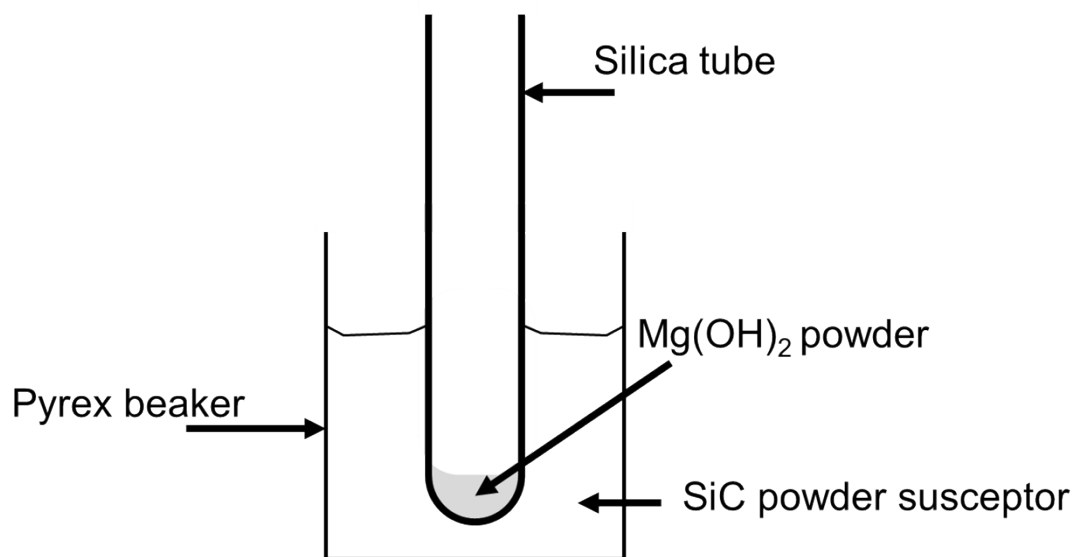

**Fig. S1:** Experimental set-up for the synthesis of  $\text{MgO}$  (**4**) in the MMC.

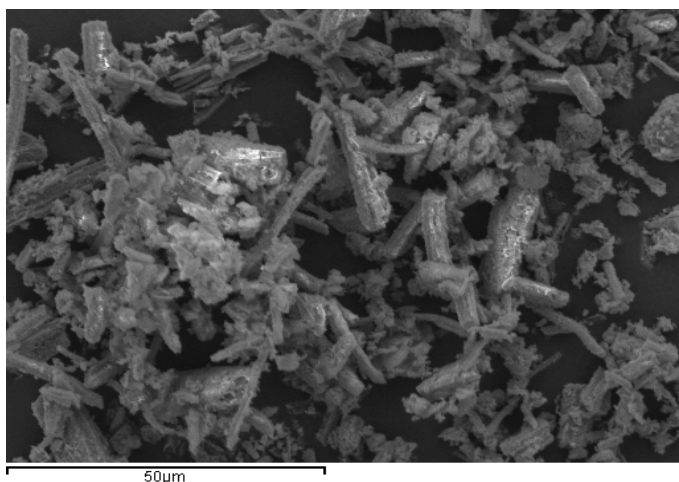

**Fig. S2:** SEM micrograph illustrating the morphology of the as-received MgO

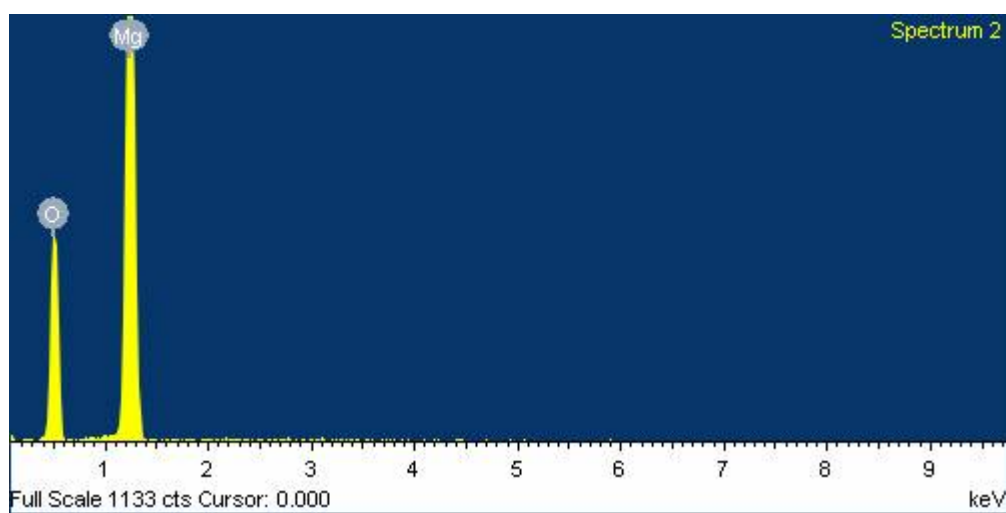

**Fig S3:** Representative EDX for commercial MgO

**Table S1:** Selected Peak Widths (FWHM) for commercial MgO

| hkl and Peak widths (FWHM) / ° |        |        |        |        |        |
|--------------------------------|--------|--------|--------|--------|--------|
| <b>MgO (t=0)</b>               | 111    | 200    | 220    | 311    | 222    |
|                                | 0.1584 | 0.1980 | 0.1584 | 0.1980 | 0.1584 |

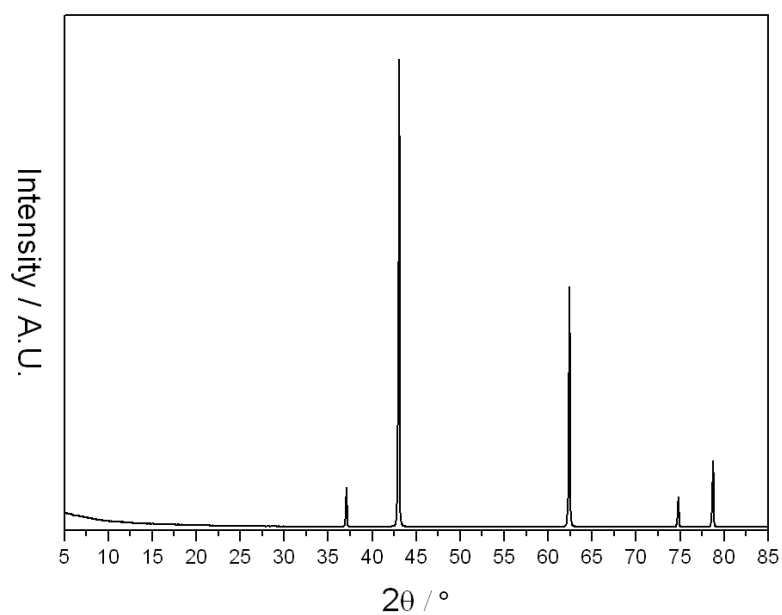

**Fig S4:** PXD pattern for commercial MgO used in the synthesis

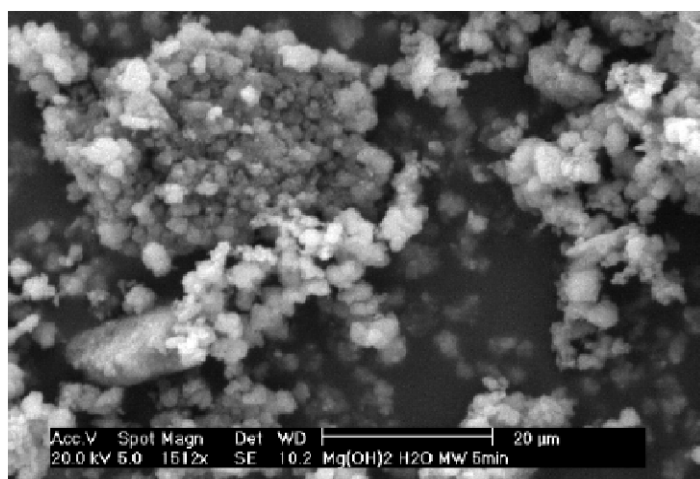

**Fig. S5** SEM micrograph illustrating the morphology of a typical  $\text{Mg(OH)}_2/\text{MgO}$  product (1) obtained at intermediate reaction times at 750 W with 5 mins heating.

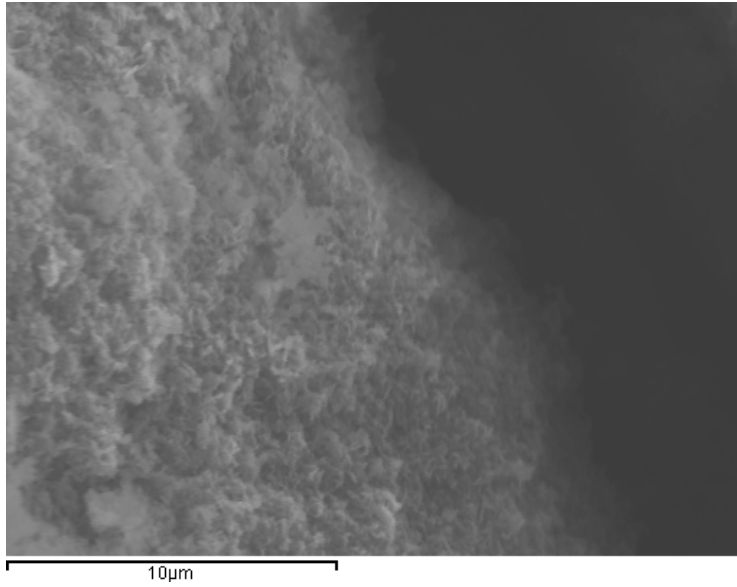

**Fig S6:** SEM micrograph illustrating the morphology of a typical  $\text{Mg(OH)}_2/\text{MgO}$  product obtained at 800 W with 1 minute of heating

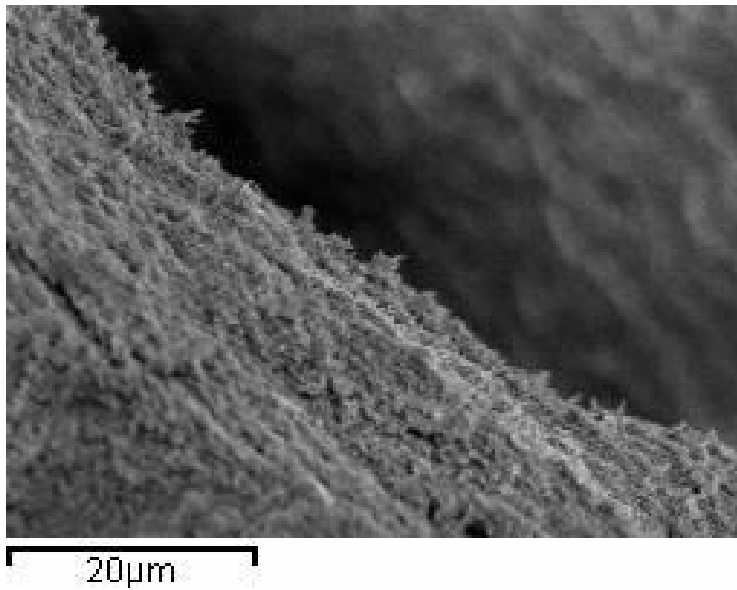

**Fig S7:** SEM micrograph illustrating the morphology of a typical  $\text{Mg(OH)}_2$  product obtained at 800 W with 2 minutes heating

**Table S2:** Dependence of Mg(OH)<sub>2</sub> phase fraction (vs. MgO) on MW synthesis parameters.

| Mass Mg used / g | Autoclave vol. / mL | MgO:H <sub>2</sub> O molar ratio | Reaction time / min | Applied power / W | Mg(OH) <sub>2</sub> phase fraction / wt% | Mg:O ratio for nanoplates / at% |
|------------------|---------------------|----------------------------------|---------------------|-------------------|------------------------------------------|---------------------------------|
| 0.4              | 23                  | 0.39                             | 3                   | 750               | 1                                        | 38:62                           |
| 0.4              | 23                  | 0.39                             | 4                   | 750               | 86                                       | 37:63                           |
| 0.4              | 23                  | 0.39                             | 5                   | 750               | 91                                       | 38:62                           |
| 0.4              | 23                  | 0.39                             | 6                   | 750               | 100                                      | 39:61                           |
| 0.8              | 45                  | 0.66                             | 4                   | 750               | 98                                       | 37:63                           |
| 0.8              | 45                  | 0.66                             | 6                   | 750               | 100                                      | ....                            |
| 0.8              | 45                  | 0.66                             | 1                   | 800               | 99                                       | 35:65                           |
| 0.8              | 45                  | 0.66                             | 2                   | 800               | 100                                      | 38:62                           |
| 0.8              | 45                  | 0.66                             | 3                   | 800               | 100                                      | 39:61                           |
| 0.8              | 45                  | 0.66                             | 4                   | 800               | 100                                      | 37:63                           |

**Table S3:** Crystallographic data for sample 2

|                                                  |                                  |
|--------------------------------------------------|----------------------------------|
| <b>Chemical Formula</b>                          | Mg(OH) <sub>2</sub>              |
| <b>Crystal System</b>                            | Trigonal                         |
| <b>Space Group</b>                               | <i>P</i> <sup>3</sup> <i>m</i> 1 |
| <i>a</i> / Å                                     | 3.150(4)                         |
| <i>c</i> / Å                                     | 4.774(9)                         |
| <b>Volume / Å<sup>3</sup></b>                    | 41.0                             |
| <b>Z</b>                                         | 1                                |
| <b>Formula Weight / g mol<sup>-1</sup></b>       | 58.319                           |
| <b>Calculated density, ρ / g cm<sup>-3</sup></b> | 2.360                            |
| <b>No. of data</b>                               | 9573                             |
| <b>No. of parameters</b>                         | 31                               |
| <b>R<sub>wp</sub></b>                            | 0.0931                           |
| <b>R<sub>p</sub></b>                             | 0.0361                           |
| <b>χ<sup>2</sup></b>                             | 4.428                            |

**Table S4:** Atomic parameters for 2 from Rietveld refinement.

| Atom Type | Wyckoff symbol | x    | y    | Z         | U <sub>iso</sub> | Site Occupancy |
|-----------|----------------|------|------|-----------|------------------|----------------|
| Mg        | 1a             | 0    | 0    | 0         | 3.39(4)          | 1              |
| O         | 2d             | 0.33 | 0.66 | 0.220(24) | 3.73(7)          | 1              |
| H         | 2d             | 0.33 | 0.66 | 0.434     | 4.10(6)          | 1              |

**Table S5:** Selected atomic distances (Å) and angles (°) for **2** from Rietveld Refinement

|              |                 |
|--------------|-----------------|
| Mg-O1/ Å     | 2 x 2.0993 (6)  |
|              | 4 x 2.0995 (6)  |
| Mg-H1/ Å     | 2 x 2.7568 (3)  |
|              | 2 x 2.7570 (3)  |
| O-H1/ Å      | 2 x 1.0231 (12) |
| O1-Mg-O1 / ° | 1 x 97.21 (4)   |
|              | 2 x 97.22 (4)   |
| O1-Mg-H1/ °  | 2 x 119.97 (3)  |
|              | 1 x 119.98 (3)  |

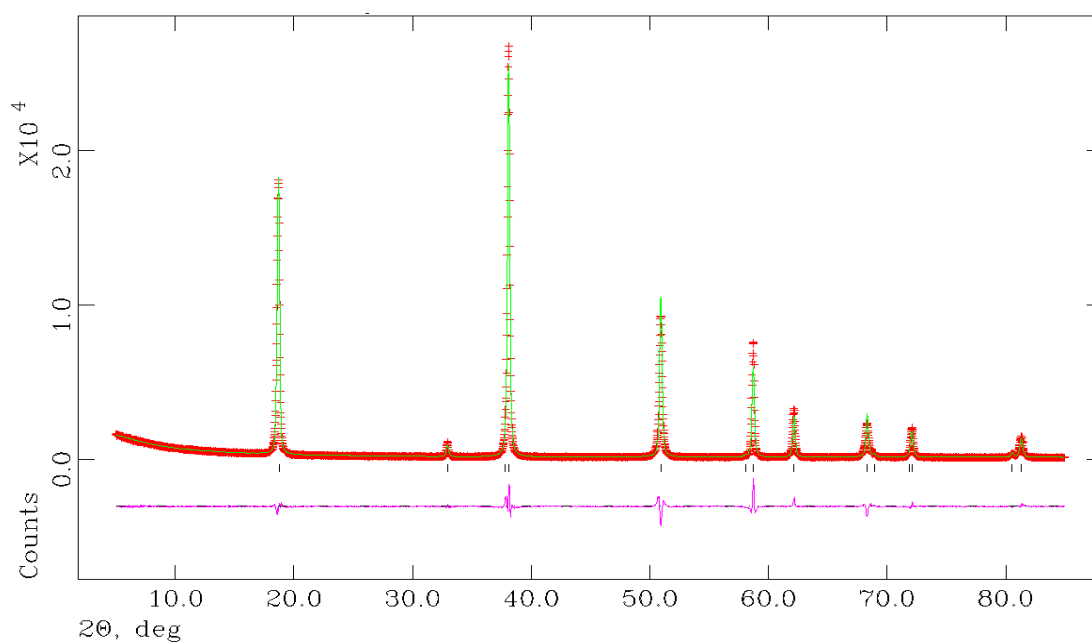

**Fig. S8:** Observed, Calculated and Difference plot for the refinement of sample **2**. Black tickmarks are reflections from Mg(OH)<sub>2</sub>

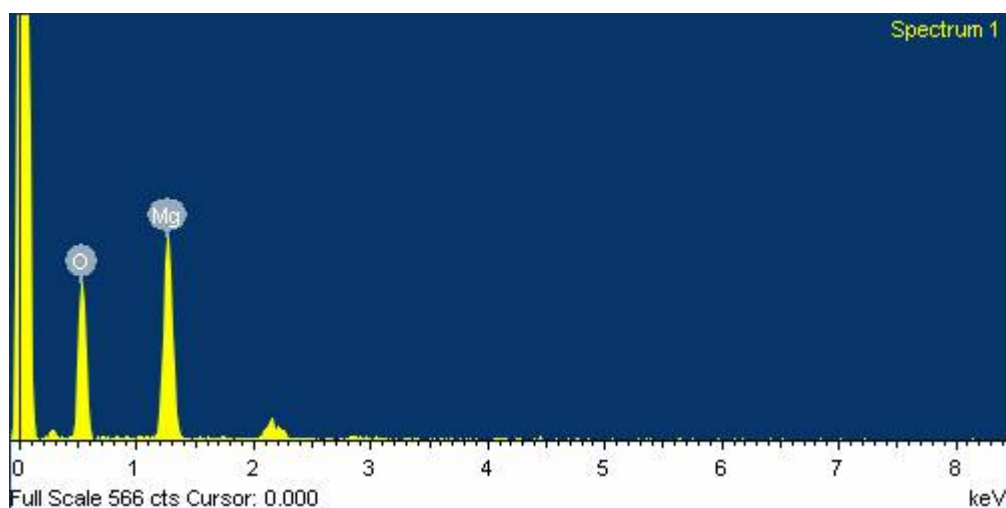

**Fig. S9:** Representative EDX spectrum for Mg(OH)<sub>2</sub> sample 2

**Table S6:** Crystallographic data for sample 3

|                                                  |             |
|--------------------------------------------------|-------------|
| <b>Chemical Formula</b>                          | MgO         |
| <b>Crystal System</b>                            | Cubic       |
| <b>Space Group</b>                               | <i>Fm3m</i> |
| <b><i>a</i> / Å</b>                              | 4.220(3)    |
| <b>Volume / Å<sup>3</sup></b>                    | 75.14(2)    |
| <b>Z</b>                                         | 1           |
| <b>Formula Weight / g mol<sup>-1</sup></b>       | 161.216     |
| <b>Calculated density, ρ / g cm<sup>-3</sup></b> | 3.563       |
| <b>No. of data</b>                               | 3889        |
| <b>No. of parameters</b>                         | 26          |
| <b>R<sub>wp</sub></b>                            | 0.0520      |
| <b>R<sub>p</sub></b>                             | 0.0386      |
| <b>χ<sup>2</sup></b>                             | 2.147       |

**Table S7:** Atomic parameters for 3 from Rietveld refinement.

| Atom Type | Wyckoff symbol | x   | y   | Z   | U <sub>iso</sub> | Site Occupancy |
|-----------|----------------|-----|-----|-----|------------------|----------------|
| Mg        | 4a             | 0   | 0   | 0   | 4.24(6)          | 1              |
| O         | 4b             | 0.5 | 0.5 | 0.5 | 2.28(6)          | 1              |

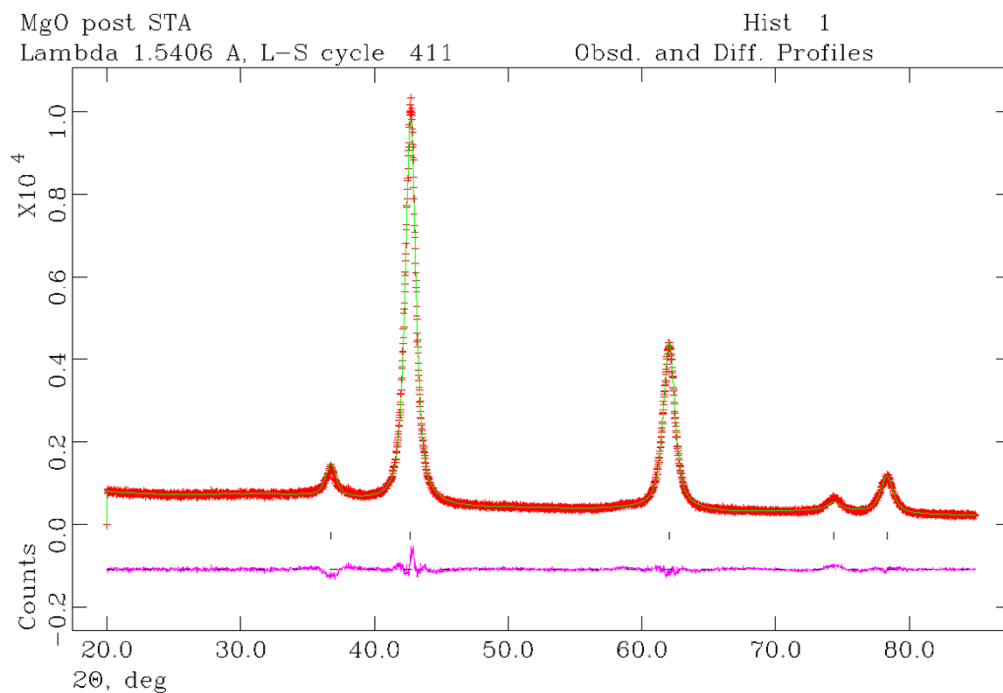

**Fig. S10:** OCD (Observed, Calculated, Difference) plot for the Rietveld Refinement for MgO (sample 3)

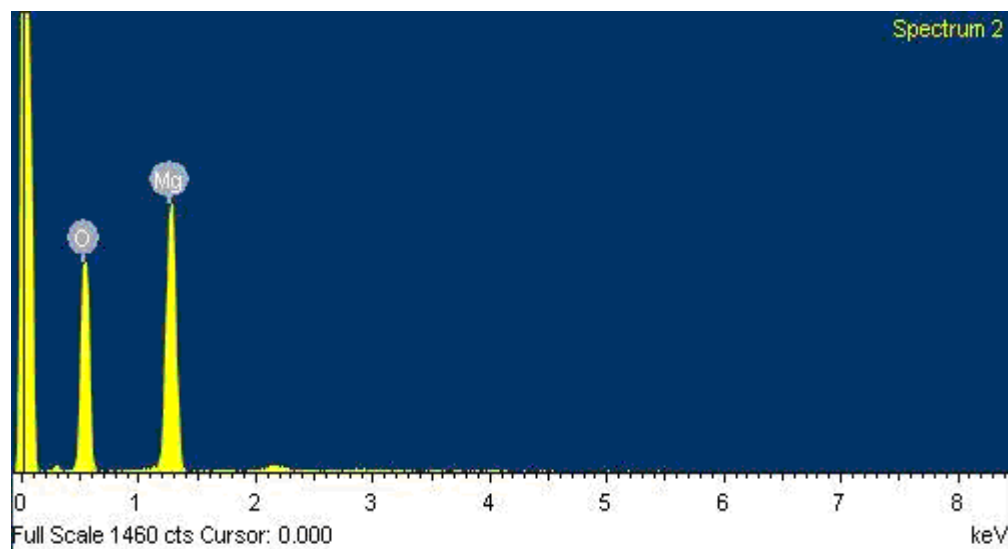

**Fig. S11:** Representative EDX for MgO (sample 3)



**Table S8:** Crystallographic data for sample 4

|                                                                  |              |
|------------------------------------------------------------------|--------------|
| <b>Chemical Formula</b>                                          | MgO          |
| <b>Crystal System</b>                                            | Cubic        |
| <b>Space Group</b>                                               | $Fm\bar{3}m$ |
| <b><math>a</math> / Å</b>                                        | 4.220(3)     |
| <b>Volume / Å<sup>3</sup></b>                                    | 75.07(1)     |
| <b>Z</b>                                                         | 1            |
| <b>Formula Weight / g mol<sup>-1</sup></b>                       | 161.216      |
| <b>Calculated density, <math>\rho</math> / g cm<sup>-3</sup></b> | 3.566        |
| <b>No. of data</b>                                               | 3888         |
| <b>No. of parameters</b>                                         | 23           |
| <b><math>R_{wp}</math></b>                                       | 0.0642       |
| <b><math>R_p</math></b>                                          | 0.0552       |
| <b><math>\chi^2</math></b>                                       | 3.086        |

**Table S9:** Atomic parameters for 4 from Rietveld refinement.

| Atom Type | Wyckoff symbol | x   | y   | Z   | $U_{iso}$ | Site Occupancy |
|-----------|----------------|-----|-----|-----|-----------|----------------|
| Mg        | 4a             | 0   | 0   | 0   | 2.63(4)   | 1              |
| O         | 4b             | 0.5 | 0.5 | 0.5 | 1.59(4)   | 1              |

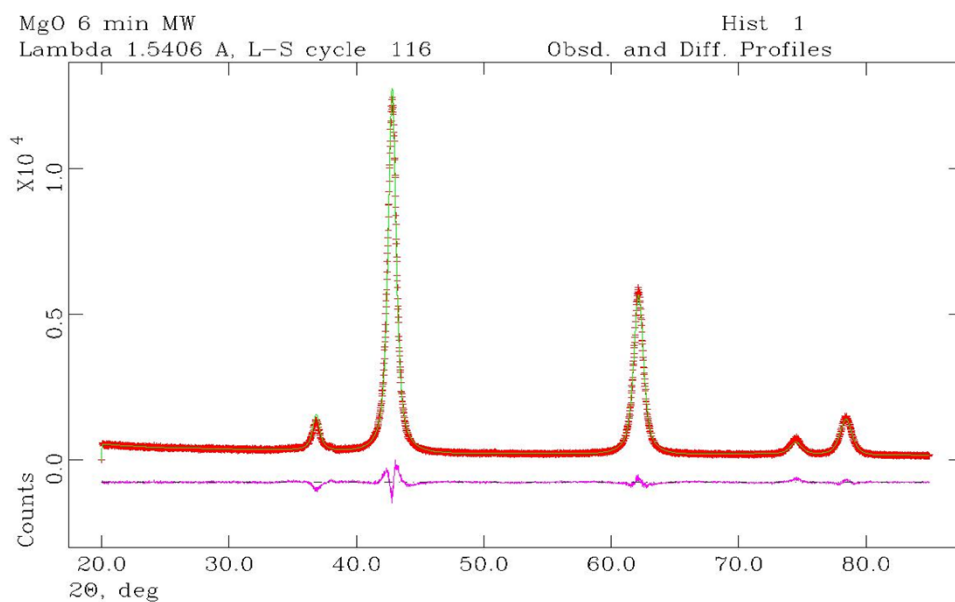**Fig. S12:** OCD (Observed, Calculated, Difference) plot for the Rietveld Refinement for MgO (sample 4)

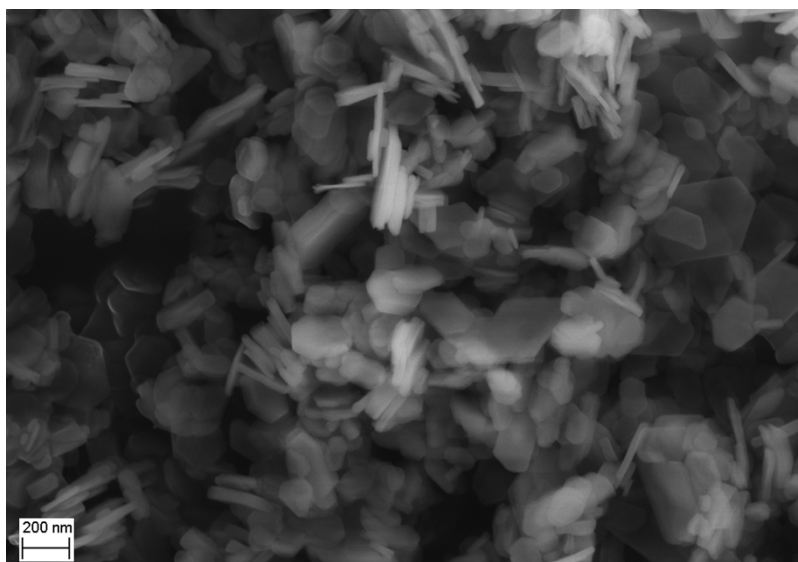

**Fig S13:** SEM micrograph illustrating the morphology of sample 4

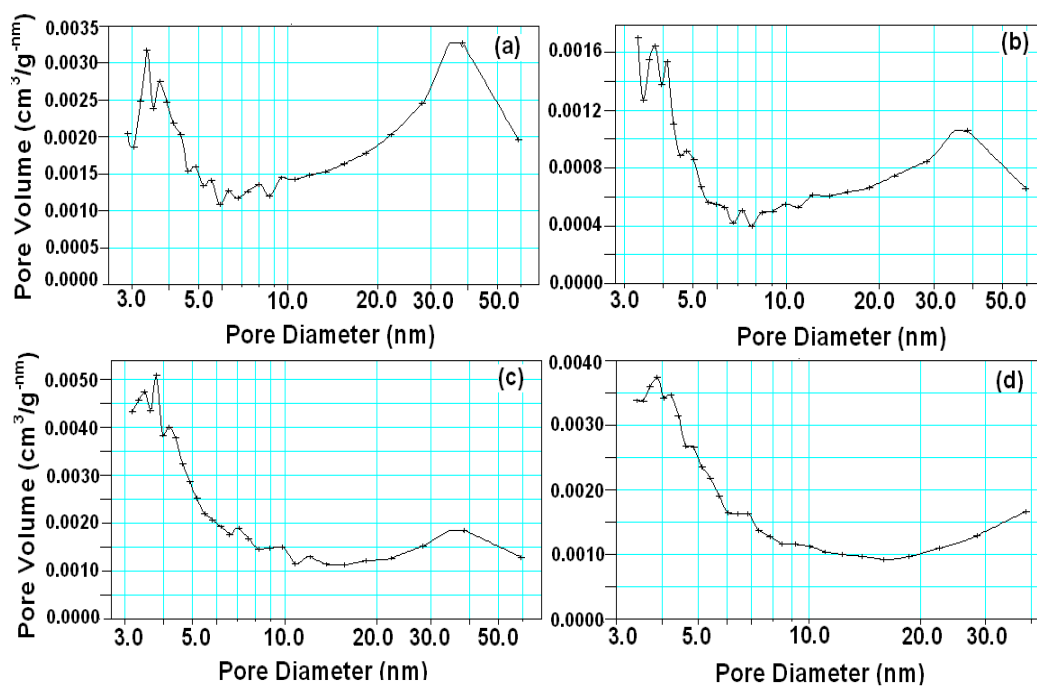

**Fig S14:** BJH desorption plots for 800 W samples: (a) 1 minute heating (Single Point Pore Volume =  $0.196 \text{ cm}^3 \text{ g}^{-1}$ , BJH pore volume =  $0.201 \text{ cm}^3 \text{ g}^{-1}$ ) (b) 2 minutes heating (Single Point Pore Volume =  $0.066 \text{ cm}^3 \text{ g}^{-1}$ , BJH pore volume =  $0.069 \text{ cm}^3 \text{ g}^{-1}$ ) (c) 3 minutes heating (Single Point Pore Volume =  $0.128 \text{ cm}^3 \text{ g}^{-1}$ , BJH pore volume =  $0.137 \text{ cm}^3 \text{ g}^{-1}$ ) and (d) 4 minutes heating (Single Point Pore Volume =  $0.112 \text{ cm}^3 \text{ g}^{-1}$ , BJH pore volume =  $0.066 \text{ cm}^3 \text{ g}^{-1}$ )

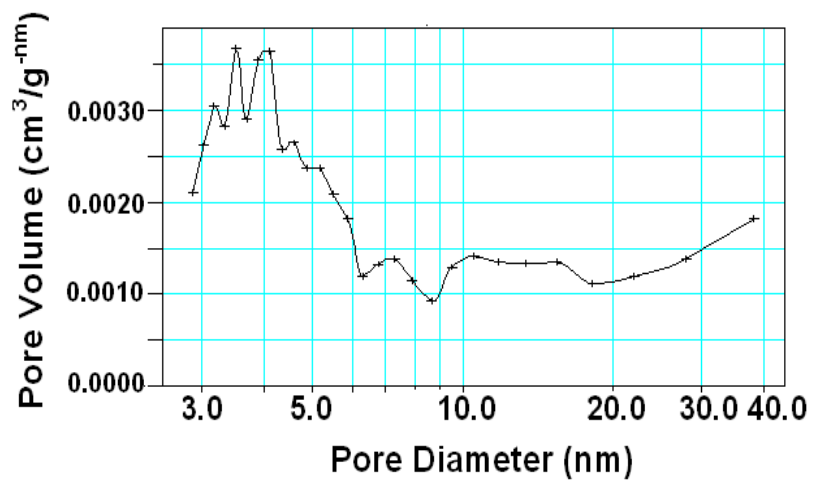

**Fig S15:** BJH desorption plot for sample **3** (MgO; Single Point Pore Volume = 0.134 cm<sup>3</sup> g<sup>-1</sup>, BJH pore volume= 0.073 cm<sup>3</sup> g<sup>-1</sup>).

**Table S8:** Selected Peak Widths (FWHM) for 800 W synthesised samples

| <b>hkl and Peak Widths (FWHM)</b> |        |        |        |        |        |        |        |        |        |        |        |        |        |
|-----------------------------------|--------|--------|--------|--------|--------|--------|--------|--------|--------|--------|--------|--------|--------|
| <b>Irradiation</b>                | 001    | 100    | 002    | 102    | 012    | 110    | 111    | 103    | 200    | 201    | 004    | 022    | 202    |
| <b>time / min</b>                 |        |        |        |        |        |        |        |        |        |        |        |        |        |
| 1                                 | 0.1248 | 0.1536 | 0.0480 | 0.0960 | 0.0960 | 0.0864 | 0.2304 | 0.0960 | 0.1920 | 0.2304 | 0.1920 | 0.0960 | 0.0960 |
| 2                                 | 0.2856 | 0.1632 | 0.2856 | 0.3468 | 0.3468 | 0.2244 | 0.2856 | 0.1020 | 0.1224 | 0.1836 | 0.3264 | 0.1020 | 0.1020 |
| 3                                 | 0.0576 | 0.1536 | 0.1920 | 0.0864 | 0.0864 | 0.1056 | 0.2496 | 0.2880 | 0.1536 | 0.2112 | 0.2688 | 0.1920 | 0.1920 |
| 4                                 | 0.2304 | 0.1728 | 0.2112 | 0.2688 | 0.2688 | 0.1920 | 0.1344 | 0.3840 | 0.2304 | 0.3072 | 0.3072 | 0.4224 | 0.4224 |

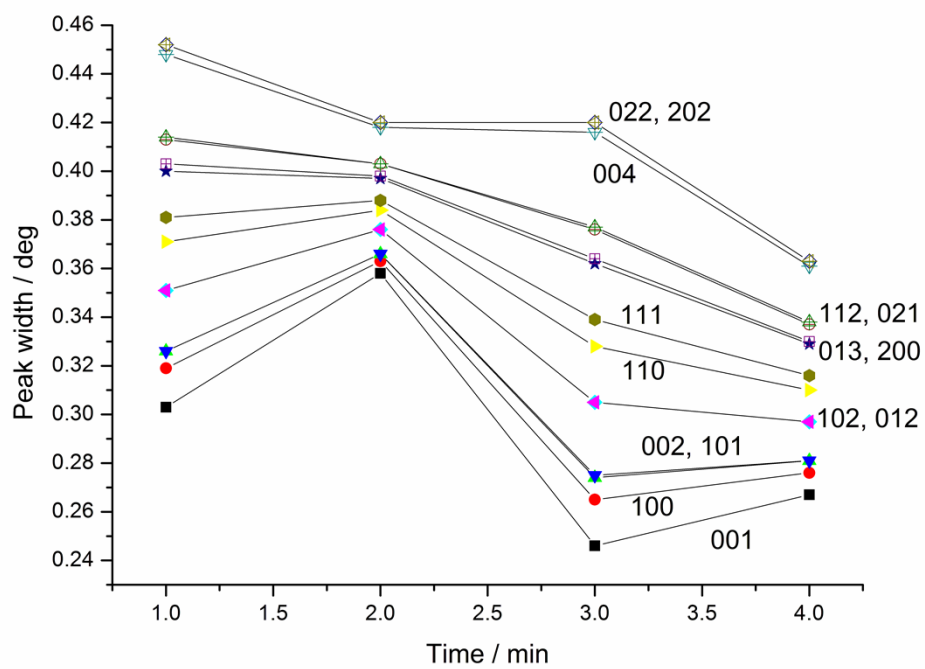

**Fig S16:** Plot of linewidths vs irradiation time for samples prepared at 800 W. Lines serve only as a guide to the eye.
